# Supplementary material for: How Does Irrigation with Wastewater Affect the Physical Soil Properties and the Root Growth of Sugarcane under Subsurface Drip?
Source: MDPI journal article supplement (doi:10.3390/agronomy14040788), 2024-04-11
Supplement: s1 [file s1]

# How does irrigation with wastewater affect the physical soil properties and the root growth of sugarcane under subsurface drip?

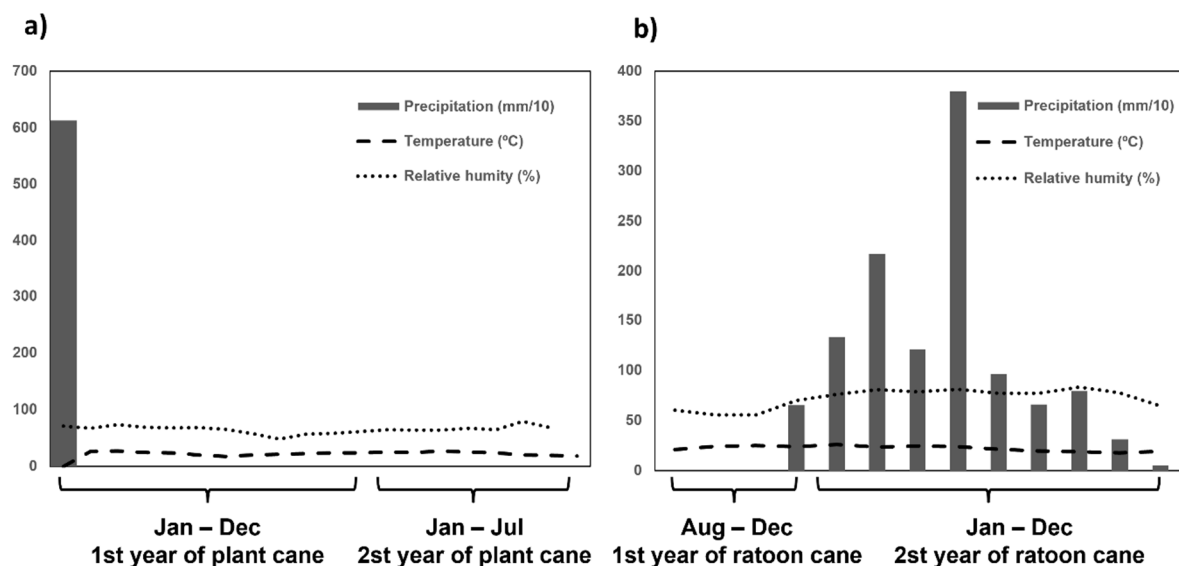

**Figure S1.** Distribution of climate data in the experimental area during the cultivation period of sugarcane under irrigation treatment with TSE or SRW. The data include plant cane (a) and ratoon cane periods (b) and precipitation, humidity, and temperature.

**Table S1.** Pre-cultivation chemical characterization of a dystrophic red latosol used for sugarcane under irrigation treatments TSE or SRW. Samples collected at 0–0.2 m soil depth.

| Properties                           | Units                              | Means | CV <sup>(1)</sup> | Level (Raij et al., 1996 [33]) |
|--------------------------------------|------------------------------------|-------|-------------------|--------------------------------|
| pH (H <sub>2</sub> O) <sup>(2)</sup> | -                                  | 5.62  | 4.77              | Medium                         |
| P <sup>(3)</sup>                     | mg dm <sup>-3</sup>                | 19.33 | 24.12             | High                           |
| S <sup>(4)</sup>                     | mg dm <sup>-3</sup>                | 15.56 | 18.81             | High                           |
| Na <sup>(5)</sup>                    | mg dm <sup>-3</sup>                | 1.9   | 30.23             | Low                            |
| K <sup>(6)</sup>                     | cmol <sub>c</sub> dm <sup>-3</sup> | 0.57  | 24.66             | High                           |
| Ca <sup>(7)</sup>                    | cmol <sub>c</sub> dm <sup>-3</sup> | 5.1   | 23.69             | High                           |
| Mg <sup>(8)</sup>                    | cmol <sub>c</sub> dm <sup>-3</sup> | 0.94  | 16.83             | Medium                         |
| Al <sup>(9)</sup>                    | cmol <sub>c</sub> dm <sup>-3</sup> | 0     | -                 | Low                            |
| H+Al <sup>(10)</sup>                 | cmol <sub>c</sub> dm <sup>-3</sup> | 3.25  | 20.5              | Medium                         |
| CEC <sup>(11)</sup>                  | cmol <sub>c</sub> dm <sup>-3</sup> | 9.87  | 9.79              | Medium                         |
| V <sup>(12)</sup>                    | %                                  | 66.4  | 13.22             | Medium                         |
| OM <sup>(13)</sup>                   | dag kg <sup>-1</sup>               | 3.75  | 10.41             | High                           |
| EC <sup>(14)</sup>                   | dS m <sup>-1</sup>                 | 0.1   | 17.78             | Low                            |
| ESP <sup>(15)</sup>                  | %                                  | 0.08  | 21.62             | Low                            |

<sup>(1)</sup>Coefficient of variation in percentage; <sup>(2)</sup>Potential of hydrogen; <sup>(3)</sup>Phosphorus; <sup>(4)</sup>Sulphur; <sup>(5)</sup>Sodium; <sup>(6)</sup>Potassium; <sup>(7)</sup>Calcium; <sup>(8)</sup>Magnesium; <sup>(9)</sup>Aluminum; <sup>(10)</sup>Potential acidity; <sup>(11)</sup>Cation exchange capacity; <sup>(12)</sup>Base saturation; <sup>(13)</sup>Organic matter; <sup>(14)</sup>Electrical conductivity; <sup>(15)</sup>Exchangeable sodium percentage.

**Table S2.** Pre-cultivation characterization regarding sodic-saline properties and the classification by Richards (1954) [37] of a dystrophic red latosol used for sugarcane under irrigation treatments TSE or SRW. Samples collected at 0–0.2, 0.2–0.4, 0.4–0.6, and 0.6–0.8 m soil depths.

| Properties              | Units                  | Soil depth layers (m) |         |         |         | CV <sup>(6)</sup> | General average |
|-------------------------|------------------------|-----------------------|---------|---------|---------|-------------------|-----------------|
|                         |                        | 0-0.2                 | 0.2-0.4 | 0.4-0.6 | 0.6-0.8 |                   |                 |
| pH <sup>(1)</sup>       | -                      | 5.5                   | 5.6     | 5.7     | 5.8     | 3.9               | 5.7             |
| EC <sup>(2)</sup>       | dS m <sup>-1</sup>     | 0.19                  | 0.1     | 0.09    | 0.10    | 53.57             | 0.12            |
| ESP <sup>(3)</sup>      | %                      | 0.07                  | 0.1     | 0.09    | 0.01    | 25.09             | 0.1             |
| SAR <sup>(4)</sup>      | mmolc dm <sup>-3</sup> | 0.01                  | 0.02    | 0.01    | 0.02    | 19.77             | 0.02            |
| CLASSIF. <sup>(5)</sup> | -                      | Normal                | Normal  | Normal  | Normal  | -                 | -               |

<sup>(1)</sup>Potential of hydrogen; <sup>(2)</sup>Electrical conductivity; <sup>(3)</sup>Exchangeable sodium percentage; <sup>(4)</sup>Sodium absorption ratio; <sup>(5)</sup>Soil classification according to Richards criteria (1954); <sup>(6)</sup>Coefficient of variation in percentage.

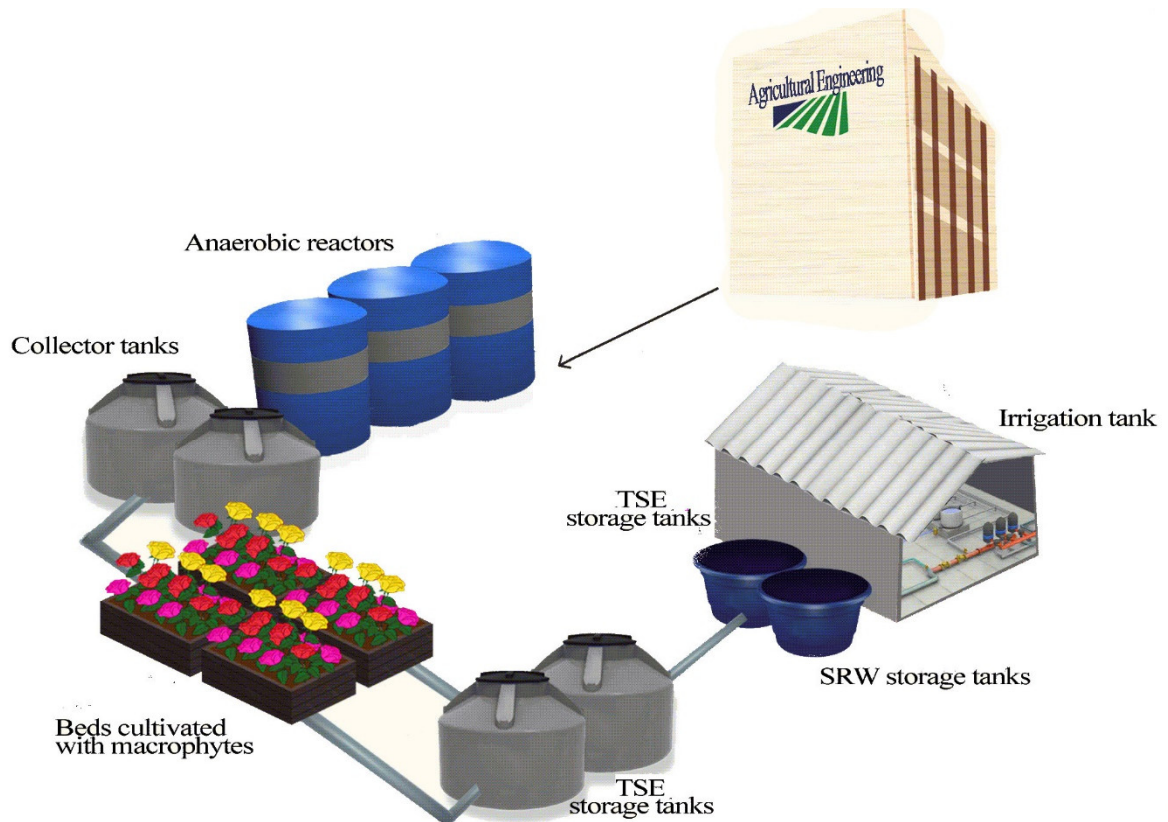

**Figure S2.** FEAGRI-UNICAMP integrated sewage treatment system used to generate the TSE used to irrigate sugarcane crops.

**Table S3.** Monthly averages of the properties of TSE and SRW used to irrigate sugarcane crops.

| First ratoon cane                                          |                     |                     |            |        |
|------------------------------------------------------------|---------------------|---------------------|------------|--------|
| Properties                                                 | Rainy season        |                     | Dry season |        |
|                                                            | TSE <sup>(19)</sup> | SRW <sup>(20)</sup> | TSE        | SRW    |
| N-total (mg.L <sup>-1</sup> ) <sup>(1)</sup>               | 59.23               | 1.06                | 98.05      | 0.68   |
| P-total (mg.L <sup>-1</sup> ) <sup>(2)</sup>               | 8.57                | 0.04                | 20.5       | 0.04   |
| K (mg.L <sup>-1</sup> ) <sup>(3)</sup>                     | 25                  | 1.35                | 26.7       | 0.81   |
| Ca (mg.L <sup>-1</sup> ) <sup>(4)</sup>                    | 18.56               | 3.7                 | 21.6       | 4.4    |
| Mg (mg.L <sup>-1</sup> ) <sup>(5)</sup>                    | 3.3                 | 2.48                | 3.8        | 3.18   |
| S (mg.L <sup>-1</sup> ) <sup>(6)</sup>                     | 14.6                | <5                  | 6.15       | <5     |
| Na (mg.L <sup>-1</sup> ) <sup>(7)</sup>                    | 56.36               | 2.2                 | 76.7       | 2.2    |
| B (mg.L <sup>-1</sup> ) <sup>(8)</sup>                     | 0.31                | <0.001              | 0.2        | <0.001 |
| Fe (mg.L <sup>-1</sup> ) <sup>(9)</sup>                    | 0.84                | 0.2                 | 0.93       | 0.25   |
| Mn (mg.L <sup>-1</sup> ) <sup>(10)</sup>                   | 0.08                | 0.03                | 0.06       | 0.02   |
| Zn (mg.L <sup>-1</sup> ) <sup>(11)</sup>                   | 0.08                | 0.08                | 0.05       | 0.05   |
| Cl (mg.L <sup>-1</sup> ) <sup>(12)</sup>                   | 0.02                | 0.03                | <0.01      | <0.01  |
| BOD (mg.L <sup>-1</sup> ) <sup>(13)</sup>                  | 5                   | <5                  | 14.7       | <5     |
| EC (dS. m <sup>-1</sup> ) <sup>(14)</sup>                  | 0.99                | 0.07                | 1.24       | 0.06   |
| SAR (mmol.L <sup>-1</sup> ) <sup>(15)</sup>                | 4.46                | 0.3                 | 5.66       | 0.27   |
| pH (a 20 <sup>o</sup> C) <sup>(16)</sup>                   | 7.7                 | 7.33                | 7.21       | 7.23   |
| FC (MPN.100 mL <sup>-1</sup> ) <sup>(17)</sup>             | 72167               | -                   | 23215380   | 59     |
| <i>E. coli</i> (MPN.100 mL <sup>-1</sup> ) <sup>(18)</sup> | 66827               | -                   | 203910     | 66     |

<sup>(1)</sup>Total nitrogen; <sup>(2)</sup>Total phosphorus; <sup>(3)</sup>Potassium; <sup>(4)</sup>Calcium; <sup>(5)</sup>Magnesium; <sup>(6)</sup>Sulphur; <sup>(7)</sup>Sodium; <sup>(8)</sup>Boron; <sup>(9)</sup>Iron; <sup>(10)</sup>Manganese; <sup>(11)</sup>Zinc; <sup>(12)</sup>Chlorine; <sup>(13)</sup>Biochemical oxygen demand; <sup>(14)</sup>Electrical conductivity; <sup>(15)</sup>Sodium absorption ratio; <sup>(16)</sup>Potential of hydrogen; <sup>(17)</sup>Fecal coliforms; <sup>(18)</sup>*Escherichia coli*; <sup>(19)</sup>Coefficient of variation in percentage; <sup>(19)</sup>Treated sewage effluent; <sup>(20)</sup>Surface reservoir water.
